# Supplementary material for: Balancing expectations amidst limitations: the dynamics of food decision-making in rural Kerala
Source: Springer Nature journal article supplement (doi:10.1186/s12889-015-1880-5), 2015-07-11
Supplement: MOESM2 [file 9749582]

## Additional file 2

### Example of meaning units and abstraction till sub-themes for two data sections (different colours) from one participant in FGD 1

| Meaning units                                                                                                                                                                        | Condensed meaning units                         | Codes                              | Sub-categories                                     | Categories               | Sub-themes                     |
|--------------------------------------------------------------------------------------------------------------------------------------------------------------------------------------|-------------------------------------------------|------------------------------------|----------------------------------------------------|--------------------------|--------------------------------|
| To get a pack of vegetables that cost minimum 20/-, we have to pay a bus fare of 10/-. So, we need total 30/-. Some of us have to take an auto for 45/- to get this 20/- vegetables. | Transport is more expensive than the vegetables | Expensive travel                   | Financial access to market - Money costs           | Monetary and other costs | Counting and meeting the costs |
| Mornings often there is no bus.                                                                                                                                                      | No transport to market                          | Lack of transport to market        | Physical access to market – Money and effort costs |                          |                                |
| For return, if the auto driver is nice, he may charge only 30/-. Or else we have to walk.                                                                                            | Market is too far away – too much to spend      | Market is too far away             |                                                    |                          |                                |
| If we walk in this sun, we will be so tired or sick with cough or breathing difficulty that next day we can't go anywhere, do anything.                                              | Market is too far away – too much effort        | Cannot cope the next day           | Adjustment or coping costs                         |                          |                                |
| Sometimes, when we feel we cannot walk, we just decide that there will be no vegetables on that day.                                                                                 | It is too much trouble to get vegetables        | Adjust with no vegetables          |                                                    |                          |                                |
| We use 'chammanthi' if we don't have fish.                                                                                                                                           | Use only coconut chutney and rice               | Manage basic needs                 | Manage with what we have                           |                          |                                |
| Most of the time we don't use vegetables.                                                                                                                                            | Don't use vegetables regularly                  | Cannot afford vegetables regularly |                                                    |                          |                                |
| We don't have money of our own so, we can't do anything.                                                                                                                             | No money of our own                             | Women have no money of their own   | Financial resources and dependence                 |                          |                                |
| We can only use the money that our husbands give us.                                                                                                                                 | Money given by spouse                           | Money has to be given by spouse    |                                                    |                          |                                |
